# Supplementary material
Source: publisher figshare collection journal article supplement (https://gsapubs.figshare.com/articles/dataset/_/21822114)
Supplement: Supplementary file 1 [file 1]

Mingdi Gao, Haijin Xu, Stephen F. Foley, Junfeng Zhang, and Yu Wang, 2022, Ultrahigh-pressure mantle metasomatism in continental collision zones recorded by post-collisional mafic rocks: GSA Bulletin, <https://doi.org/10.1130/B36610.1>.

## Supplemental Material

### **EPMA analytical condition**

### **Melting trajectories in Fig. 7B**

**Table S1.** EPMA determined mineral compositions in the Shidao mafic dykes.

**Table S2.** Major and trace compositions of the Early Cretaceous mafic rocks in Dabie–Sulu.

**Table S3.** Major and trace compositions of the Alpine–Himalayan ultrapotassic rocks.

**Table S4.** Partition coefficients for Rb and Sr between minerals and potassium-rich melts.

Numbers in bold are selected to conduct the calculation in Figure 7.

**Table S5.** Run conditions, products and K<sub>2</sub>O, Na<sub>2</sub>O, Rb, Sr contents of the melt in the experiments of Foley et al. (1999, 2022).

**Table S6.** Phase proportions and melting modes used in the non-modal fractional melting modelling.

**Table S7.** Partition coefficients used in the non-modal fractional melting modelling.

# Ultra-high pressure mantle metasomatism in continental collision zones recorded by post-collisional mafic rocks

Mingdi Gao<sup>1,2,3,4</sup>, Haijin Xu<sup>3\*</sup>, Stephen F. Foley<sup>4</sup>, Junfeng Zhang<sup>3</sup>, Yu Wang<sup>1,2</sup>

<sup>1</sup> *State Key Laboratory of Isotope Geochemistry, Guangzhou Institute of Geochemistry,*

*Chinese Academy of Sciences, Guangzhou 510640, China*

<sup>2</sup> *Chinese Academy of Sciences Center for Excellence in Deep Earth Science,*

*Guangzhou 510640, China*

<sup>3</sup> *School of Earth Sciences, China University of Geosciences, Wuhan 430074, China*

<sup>4</sup> *School of Natural Sciences, Macquarie University, North Ryde, NSW 2109, Australia*

## EPMA analytical condition

### Calculation of melting trajectories in Fig. 7B

**Table S1.** EPMA determined mineral compositions in the Shidao mafic dikes

**Table S2.** Major and trace compositions of the Early Cretaceous mafic rocks in Dabie–Sulu.

**Table S3.** Major and trace compositions of the Alpine–Himalayan ultrapotassic rocks.

**Table S4.** Partition coefficients for Rb and Sr between minerals and potassium-rich melts.

**Table S5.** Run conditions, products and K<sub>2</sub>O, Na<sub>2</sub>O, Rb, Sr contents of the melt in the experiments of [Foley et al. \(1999, 2022\)](#).

**Table S6.** Phase proportions and melting modes used in the non-modal fractional melting modelling.

**Table S7.** Partition coefficients used in the non-modal fractional melting modelling.

### EPMA analytical condition

Major compositions of the minerals were analyzed using a JEOL JXA-8230 electron probe microanalyzer in wavelength-dispersive mode. The accelerating voltage was 15 kV. Olivine and clinopyroxene were analyzed with 1  $\mu\text{m}$  beam size at 20 nA. Amphibole, biotite, sanidine and plagioclase were analyzed with 3–5  $\mu\text{m}$  beam size at 20 nA. Sodium was analyzed first to minimize errors due to volatilization. Dwell times were 10s on element peaks and half that on background locations adjacent to peaks. Raw x-ray intensities were corrected using a ZAF (atomic number, absorption, fluorescence) correction procedure. A series of natural and synthetic SPI standards including sanidine (K), pyrope garnet (Fe, Al), diopside (Ca, Mg), jadeite (Na), rhodonite (Mn), olivine (Si), rutile (Ti) and apatite (P, F), tugtupite (Cl) were used for calibration.

### Melting trajectories in Fig. 7B

The melting trajectory of the Phl-peridotite (also contains minor calcic amphibole) is based on the experimental results of [Condamine and Médard \(2014\)](#). Melt  $\text{K}_2\text{O}/\text{Na}_2\text{O}$  ratios were reported in their study. Melt Rb/Sr ratios were calculated based on the batch melting model:

$$c_i^L = \frac{c_i^0}{\bar{D}_i * (1 - F) + F}$$

where  $c_i^0$  denotes the concentration of element  $i$  in the protolith;  $c_i^L$  is its concentration in the melt;  $\bar{D}_i$  is the bulk partition coefficients, which is calculated based on the phase proportion and the partition coefficient for each phase ( $D_i$ ).  $F$  is the melting degree. Here, the phase proportion and  $F$  are available from [Condamine and Médard \(2014\)](#). Mineral/melt  $D_{\text{Rb}}$  and  $D_{\text{Sr}}$  used for the calculation are listed in the following [Supplemental Table S4](#). Rb/Sr ratio in the protolith is set at 0.5, which value is comparable to many natural phlogopite peridotite samples ([Zanetti et al., 1999](#); [Zhang et al., 2011](#)).

The melting trajectory of the MARID assemblage is from [Foley et al. \(2022\)](#). The run products, melting degree and measured melt  $\text{K}_2\text{O}/\text{Na}_2\text{O}$  and Rb/Sr ratios are listed in the following [Supplemental Table S5](#).



**Table S1.** EPMA determined mineral compositions in the Shidao mafic dykes

| Mineral               | SiO <sub>2</sub> | TiO <sub>2</sub> | Al <sub>2</sub> O <sub>3</sub> | FeO   | MnO  | MgO   | CaO   | Na <sub>2</sub> O | K <sub>2</sub> O | Cr <sub>2</sub> O <sub>3</sub> | NiO  | P <sub>2</sub> O <sub>5</sub> | F    | Cl   | Total  | Mg#   |
|-----------------------|------------------|------------------|--------------------------------|-------|------|-------|-------|-------------------|------------------|--------------------------------|------|-------------------------------|------|------|--------|-------|
| 12-DS-03              |                  |                  |                                |       |      |       |       |                   |                  |                                |      |                               |      |      |        |       |
| 12-DS-03-p-ol-1       | 41.75            | 0.00             | 0.03                           | 9.01  | 0.13 | 49.95 | 0.29  | 0.02              | 0.00             | 0.08                           | 0.27 | 0.04                          |      |      | 101.55 | 90.89 |
| 12-DS-03-p-ol-2       | 41.44            | 0.00             | 0.00                           | 10.59 | 0.18 | 48.31 | 0.25  | 0.00              | 0.00             | 0.09                           | 0.22 | 0.02                          |      |      | 101.10 | 89.14 |
| 12-DS-03-p-ol-3       | 42.20            | 0.00             | 0.07                           | 9.02  | 0.14 | 48.44 | 0.90  | 0.03              | 0.00             | 0.05                           | 0.29 | 0.01                          |      |      | 101.15 | 90.63 |
| 12-DS-03-p-ol-4       | 41.32            | 0.00             | 0.05                           | 9.40  | 0.14 | 48.73 | 0.44  | 0.02              | 0.00             | 0.03                           | 0.15 | 0.07                          |      |      | 100.35 | 90.32 |
| 12-DS-03-p-ol-5       | 41.39            | 0.01             | 0.09                           | 9.36  | 0.16 | 48.88 | 0.43  | 0.04              | 0.00             | 0.23                           | 0.26 | 0.01                          |      |      | 100.87 | 90.39 |
| 12-DS-03-p-ol-6       | 41.63            | 0.00             | 0.08                           | 9.76  | 0.15 | 49.57 | 0.20  | 0.01              | 0.00             | 0.08                           | 0.21 | 0.01                          |      |      | 101.69 | 90.14 |
| 12-DS-03-p-ol-7       | 41.06            | 0.01             | 0.03                           | 12.65 | 0.19 | 46.94 | 0.04  | 0.00              | 0.00             | 0.03                           | 0.11 | 0.00                          |      |      | 101.05 | 86.98 |
| 12-DS-03-p-ol-8       | 40.89            | 0.00             | 0.00                           | 14.75 | 0.23 | 46.04 | 0.04  | 0.00              | 0.01             | 0.00                           | 0.02 | 0.00                          |      |      | 101.98 | 84.89 |
| olivine average       | 41.46            | 0.00             | 0.04                           | 10.57 | 0.16 | 48.36 | 0.32  | 0.02              | 0.00             | 0.05                           | 0.19 | 0.02                          |      |      | 101.19 | 89.17 |
| 1σ                    | 0.41             | 0.00             | 0.04                           | 2.07  | 0.03 | 1.30  | 0.28  | 0.01              | 0.00             | 0.03                           | 0.09 | 0.02                          |      |      | 0.54   | 2.14  |
| 12-DS-03-p-cpx-1      | 52.66            | 0.65             | 2.72                           | 4.54  | 0.07 | 15.59 | 22.91 | 0.22              | 0.01             | 0.06                           | 0.07 | 0.02                          |      |      | 99.51  | 86.08 |
| 12-DS-03-p-cpx-2      | 51.87            | 0.71             | 3.29                           | 5.16  | 0.08 | 15.74 | 22.95 | 0.22              | 0.00             | 0.10                           | 0.02 | 0.01                          |      |      | 100.13 | 84.58 |
| 12-DS-03-p-cpx-3      | 52.26            | 0.77             | 3.11                           | 5.08  | 0.10 | 15.64 | 22.72 | 0.26              | 0.00             | 0.14                           | 0.00 | 0.02                          |      |      | 100.11 | 84.72 |
| 12-DS-03-p-cpx-4      | 51.42            | 0.54             | 3.06                           | 8.52  | 0.42 | 12.62 | 21.98 | 0.83              | 0.01             | 0.02                           | 0.01 | 0.02                          |      |      | 99.45  | 72.72 |
| 12-DS-03-p-cpx-5      | 52.38            | 0.57             | 2.73                           | 3.97  | 0.07 | 15.89 | 22.88 | 0.22              | 0.01             | 0.52                           | 0.04 | 0.01                          |      |      | 99.30  | 87.80 |
| 12-DS-03-p-cpx-6      | 53.70            | 0.43             | 1.49                           | 3.73  | 0.10 | 16.68 | 23.08 | 0.17              | 0.00             | 0.21                           | 0.02 | 0.00                          |      |      | 99.60  | 88.96 |
| 12-DS-03-p-cpx-7      | 51.37            | 0.84             | 3.64                           | 6.10  | 0.11 | 15.11 | 22.23 | 0.29              | 0.00             | 0.03                           | 0.00 | 0.02                          |      |      | 99.74  | 81.67 |
| clinopyroxene average | 52.23            | 0.64             | 2.86                           | 5.30  | 0.14 | 15.32 | 22.68 | 0.32              | 0.00             | 0.16                           | 0.02 | 0.01                          |      |      | 99.69  | 83.79 |
| 1σ                    | 0.81             | 0.14             | 0.68                           | 1.63  | 0.13 | 1.28  | 0.41  | 0.23              | 0.00             | 0.17                           | 0.02 | 0.01                          |      |      | 0.32   | 5.42  |
| 12-DS-03-m-bt-1       | 36.27            | 2.50             | 14.87                          | 16.29 | 0.21 | 14.43 | 0.00  | 0.14              | 9.62             | 0.05                           | 0.02 | 0.02                          | 0.48 | 0.15 | 94.81  | 61.46 |
| 12-DS-03-m-bt-2       | 36.37            | 2.89             | 14.78                          | 16.18 | 0.22 | 14.54 | 0.03  | 0.16              | 9.25             | 0.02                           | 0.04 | 0.00                          | 0.56 | 0.17 | 94.93  | 61.80 |
| 12-DS-03-m-bt-3       | 35.69            | 2.51             | 14.80                          | 15.52 | 0.21 | 14.30 | 0.07  | 0.26              | 9.23             | 0.03                           | 0.00 | 0.02                          | 0.55 | 0.16 | 93.06  | 62.39 |
| 12-DS-03-m-bt-4       | 36.31            | 2.85             | 14.76                          | 16.22 | 0.24 | 13.82 | 0.02  | 0.12              | 9.22             | 0.01                           | 0.00 | 0.02                          | 0.52 | 0.14 | 94.00  | 60.53 |
| 12-DS-03-m-bt-5       | 34.64            | 2.60             | 15.52                          | 15.86 | 0.20 | 14.03 | 0.05  | 0.14              | 8.93             | 0.00                           | 0.01 | 0.03                          | 0.37 | 0.14 | 92.34  | 61.41 |
| biotite average       | 35.86            | 2.67             | 14.95                          | 16.01 | 0.22 | 14.22 | 0.03  | 0.16              | 9.25             | 0.02                           | 0.02 | 0.02                          | 0.50 | 0.15 | 93.83  | 61.52 |
| 1σ                    | 0.73             | 0.19             | 0.32                           | 0.32  | 0.02 | 0.30  | 0.03  | 0.05              | 0.24             | 0.02                           | 0.02 | 0.01                          | 0.08 | 0.01 | 1.12   | 0.68  |
| 12-DS-03-m-amp-1      | 38.62            | 1.16             | 13.11                          | 18.83 | 0.30 | 9.43  | 11.45 | 1.86              | 2.20             | 0.02                           | 0.00 | 0.02                          |      |      | 96.99  | 47.41 |
| 12-DS-03-m-amp-2      | 38.88            | 1.37             | 13.41                          | 19.06 | 0.28 | 9.33  | 11.51 | 1.95              | 2.26             | 0.02                           | 0.03 | 0.04                          |      |      | 98.13  | 46.84 |

|                       |       |      |       |       |      |       |       |      |       |      |      |      |      |      |        |       |
|-----------------------|-------|------|-------|-------|------|-------|-------|------|-------|------|------|------|------|------|--------|-------|
| 12-DS-03-m-amp-3      | 38.63 | 1.33 | 13.06 | 19.10 | 0.32 | 9.24  | 11.38 | 1.98 | 2.28  | 0.02 | 0.00 | 0.01 |      |      | 97.36  | 46.54 |
| 12-DS-03-m-amp-4      | 39.08 | 1.34 | 12.95 | 18.89 | 0.31 | 9.26  | 11.53 | 2.17 | 2.13  | 0.02 | 0.01 | 0.00 |      |      | 97.69  | 46.87 |
| 12-DS-03-m-amp-5      | 39.17 | 1.33 | 13.83 | 18.96 | 0.33 | 9.36  | 11.39 | 1.98 | 2.22  | 0.00 | 0.00 | 0.01 |      |      | 98.58  | 47.05 |
| amphibole average     | 38.87 | 1.31 | 13.27 | 18.97 | 0.31 | 9.32  | 11.45 | 1.99 | 2.22  | 0.02 | 0.01 | 0.02 |      |      | 97.75  | 46.94 |
| 1σ                    | 0.25  | 0.09 | 0.35  | 0.11  | 0.02 | 0.08  | 0.07  | 0.11 | 0.05  | 0.01 | 0.01 | 0.01 |      |      | 0.62   | 0.32  |
| 12-DS-03-m-pl-1       | 57.85 | 0.02 | 26.45 | 0.29  | 0.04 | 0.01  | 8.15  | 6.49 | 0.14  | 0.00 | 0.00 | 0.02 |      |      | 99.46  |       |
| 12-DS-03-m-pl-2       | 59.42 | 0.00 | 25.92 | 0.39  | 0.02 | 0.01  | 7.03  | 7.10 | 0.15  | 0.01 | 0.00 | 0.03 |      |      | 100.06 |       |
| 12-DS-03-m-pl-3       | 58.04 | 0.02 | 27.22 | 0.13  | 0.00 | 0.00  | 8.41  | 6.20 | 0.12  | 0.00 | 0.01 | 0.01 |      |      | 100.15 |       |
| 12-DS-03-m-pl-4       | 60.25 | 0.00 | 25.55 | 0.38  | 0.01 | 0.00  | 7.31  | 7.00 | 0.19  | 0.01 | 0.00 | 0.01 |      |      | 100.71 |       |
| 12-DS-03-m-pl-5       | 61.59 | 0.01 | 25.49 | 0.30  | 0.00 | 0.00  | 6.88  | 6.73 | 0.17  | 0.00 | 0.02 | 0.00 |      |      | 101.18 |       |
| plagioclase average   | 59.43 | 0.01 | 26.13 | 0.30  | 0.01 | 0.00  | 7.56  | 6.71 | 0.15  | 0.00 | 0.01 | 0.01 |      |      | 100.31 |       |
| 1σ                    | 1.56  | 0.01 | 0.72  | 0.10  | 0.02 | 0.00  | 0.69  | 0.37 | 0.03  | 0.01 | 0.01 | 0.01 |      |      | 0.66   |       |
| 12-DS-03-m-san-1      | 66.73 | 0.04 | 18.81 | 0.34  | 0.04 | 0.00  | 0.12  | 0.98 | 13.99 | 0.00 | 0.00 | 0.00 |      |      | 101.04 |       |
| 12-DS-03-m-san-2      | 65.96 | 0.04 | 18.44 | 0.48  | 0.00 | 0.00  | 0.12  | 1.52 | 14.21 | 0.00 | 0.02 | 0.00 |      |      | 100.80 |       |
| 12-DS-03-m-san-3      | 66.95 | 0.09 | 19.23 | 0.16  | 0.02 | 0.00  | 0.34  | 2.70 | 11.27 | 0.00 | 0.00 | 0.00 |      |      | 100.76 |       |
| 12-DS-03-m-san-4      | 66.41 | 0.04 | 18.95 | 0.18  | 0.03 | 0.00  | 0.04  | 1.64 | 13.55 | 0.01 | 0.00 | 0.00 |      |      | 100.84 |       |
| 12-DS-03-m-san-5      | 67.17 | 0.03 | 18.99 | 0.34  | 0.02 | 0.00  | 0.11  | 2.22 | 12.61 | 0.01 | 0.00 | 0.02 |      |      | 101.52 |       |
| Sanidine average      | 66.64 | 0.05 | 18.88 | 0.30  | 0.02 | 0.00  | 0.15  | 1.81 | 13.13 | 0.01 | 0.00 | 0.00 |      |      | 100.99 |       |
| 1σ                    | 0.47  | 0.02 | 0.29  | 0.13  | 0.01 | 0.00  | 0.11  | 0.66 | 1.21  | 0.01 | 0.01 | 0.01 |      |      | 0.31   |       |
| 12-DS-04              |       |      |       |       |      |       |       |      |       |      |      |      |      |      |        |       |
| 12-DS-04-p-cpx-1      | 52.76 | 0.69 | 2.95  | 4.62  | 0.12 | 16.08 | 22.70 | 0.26 | 0.02  | 0.10 | 0.04 | 0.02 |      |      | 100.34 | 86.23 |
| 12-DS-04-p-cpx-2      | 52.57 | 0.59 | 2.57  | 4.64  | 0.08 | 16.23 | 22.82 | 0.24 | 0.00  | 0.09 | 0.03 | 0.01 |      |      | 99.88  | 86.29 |
| 12-DS-04-p-cpx-3      | 52.68 | 0.59 | 2.57  | 4.46  | 0.06 | 16.10 | 23.16 | 0.22 | 0.00  | 0.07 | 0.03 | 0.03 |      |      | 99.97  | 86.68 |
| 12-DS-04-p-cpx-4      | 50.99 | 1.10 | 4.15  | 5.74  | 0.10 | 15.60 | 22.23 | 0.24 | 0.01  | 0.03 | 0.04 | 0.03 |      |      | 100.23 | 83.02 |
| clinopyroxene average | 52.25 | 0.74 | 3.06  | 4.87  | 0.09 | 16.00 | 22.73 | 0.24 | 0.01  | 0.07 | 0.03 | 0.02 |      |      | 100.11 | 85.55 |
| 1σ                    | 0.85  | 0.24 | 0.75  | 0.59  | 0.02 | 0.28  | 0.39  | 0.01 | 0.01  | 0.03 | 0.00 | 0.01 |      |      | 0.22   | 1.70  |
| 12-DS-04-m-bt-1       | 35.00 | 1.83 | 15.62 | 16.96 | 0.21 | 14.44 | 0.11  | 0.11 | 8.29  | 0.00 | 0.02 | 0.01 | 0.58 | 0.03 | 92.95  | 60.51 |
| 12-DS-04-m-bt-2       | 36.34 | 1.65 | 15.03 | 15.76 | 0.23 | 15.10 | 0.03  | 0.16 | 9.10  | 0.00 | 0.02 | 0.00 | 0.71 | 0.03 | 93.85  | 63.30 |
| 12-DS-04-m-bt-3       | 34.68 | 1.65 | 15.61 | 16.35 | 0.22 | 14.41 | 0.06  | 0.11 | 8.18  | 0.00 | 0.01 | 0.01 | 0.59 | 0.03 | 91.65  | 61.33 |
| 12-DS-04-m-bt-4       | 36.79 | 1.86 | 15.10 | 16.02 | 0.23 | 14.94 | 0.08  | 0.12 | 9.38  | 0.00 | 0.01 | 0.03 | 0.63 | 0.03 | 94.94  | 62.67 |

|                     |       |      |       |       |      |       |       |       |       |      |      |      |      |      |       |       |
|---------------------|-------|------|-------|-------|------|-------|-------|-------|-------|------|------|------|------|------|-------|-------|
| 12-DS-04-m-bt-5     | 35.07 | 1.92 | 15.47 | 16.26 | 0.23 | 15.09 | 0.05  | 0.08  | 8.60  | 0.00 | 0.00 | 0.00 | 0.71 | 0.04 | 93.21 | 62.55 |
| biotite average     | 35.58 | 1.78 | 15.36 | 16.27 | 0.22 | 14.79 | 0.07  | 0.12  | 8.71  | 0.00 | 0.01 | 0.01 | 0.64 | 0.03 | 93.32 | 62.07 |
| 1σ                  | 0.93  | 0.12 | 0.28  | 0.45  | 0.01 | 0.35  | 0.03  | 0.03  | 0.52  | 0.00 | 0.01 | 0.01 | 0.06 | 0.00 | 1.21  | 1.13  |
| 12-DS-04-m-amp-1    | 39.24 | 0.92 | 12.86 | 17.32 | 0.30 | 9.94  | 11.56 | 2.13  | 2.16  | 0.01 | 0.02 | 0.01 |      |      | 96.46 | 50.81 |
| 12-DS-04-m-amp-2    | 40.03 | 0.85 | 13.17 | 17.76 | 0.29 | 10.22 | 11.26 | 2.40  | 2.13  | 0.02 | 0.04 | 0.00 |      |      | 98.17 | 50.88 |
| 12-DS-04-m-amp-3    | 40.24 | 0.87 | 13.10 | 17.75 | 0.28 | 10.21 | 11.26 | 2.22  | 2.05  | 0.01 | 0.03 | 0.00 |      |      | 98.02 | 50.87 |
| 12-DS-04-m-amp-4    | 40.80 | 0.94 | 12.88 | 17.22 | 0.34 | 10.49 | 11.40 | 2.41  | 2.09  | 0.00 | 0.01 | 0.01 |      |      | 98.59 | 52.31 |
| 12-DS-04-m-amp-5    | 39.46 | 0.81 | 13.39 | 18.04 | 0.27 | 10.35 | 11.49 | 2.24  | 2.15  | 0.01 | 0.00 | 0.03 |      |      | 98.24 | 50.81 |
| amphibole average   | 39.95 | 0.88 | 13.08 | 17.62 | 0.30 | 10.24 | 11.39 | 2.28  | 2.12  | 0.01 | 0.02 | 0.01 |      |      | 97.90 | 51.13 |
| 1σ                  | 0.62  | 0.05 | 0.22  | 0.34  | 0.03 | 0.21  | 0.13  | 0.12  | 0.05  | 0.01 | 0.01 | 0.01 |      |      | 0.83  | 0.66  |
| 12-DS-04-m-pl-1     | 66.81 | 0.00 | 21.46 | 0.09  | 0.01 | 0.01  | 1.18  | 9.99  | 0.40  | 0.00 | 0.00 | 0.01 |      |      | 99.95 |       |
| 12-DS-04-m-pl-2     | 66.98 | 0.02 | 20.83 | 0.26  | 0.01 | 0.00  | 1.11  | 10.21 | 0.18  | 0.01 | 0.01 | 0.01 |      |      | 99.62 |       |
| plagioclase average | 66.90 | 0.01 | 21.14 | 0.18  | 0.01 | 0.00  | 1.15  | 10.10 | 0.29  | 0.00 | 0.01 | 0.01 |      |      | 99.78 |       |
| 1σ                  | 0.12  | 0.01 | 0.45  | 0.12  | 0.00 | 0.00  | 0.05  | 0.15  | 0.15  | 0.01 | 0.01 | 0.00 |      |      | 0.23  |       |
| 12-DS-04-m-san-1    | 64.60 | 0.06 | 18.93 | 0.18  | 0.01 | 0.00  | 0.05  | 1.45  | 14.19 | 0.00 | 0.00 | 0.00 |      |      | 99.47 |       |
| 12-DS-04-m-san-2    | 64.90 | 0.07 | 19.04 | 0.23  | 0.01 | 0.00  | 0.04  | 1.41  | 14.12 | 0.00 | 0.01 | 0.00 |      |      | 99.83 |       |
| sanidine average    | 64.75 | 0.07 | 18.98 | 0.21  | 0.01 | 0.00  | 0.04  | 1.43  | 14.15 | 0.00 | 0.01 | 0.00 |      |      | 99.65 |       |
| 1σ                  | 0.21  | 0.01 | 0.08  | 0.03  | 0.00 | 0.00  | 0.01  | 0.03  | 0.05  | 0.00 | 0.01 | 0.00 |      |      | 0.25  |       |

Tables S2–S3 are listed in separate excel files.

**Table S4.** Partition coefficients for Rb and Sr between minerals and potassium-rich melts. Numbers in bold are selected to conduct the calculation in Figure 7.

| Data Source               | Mineral       | Liquid      | D <sub>Rb</sub> | D <sub>Sr</sub> |
|---------------------------|---------------|-------------|-----------------|-----------------|
| Adam & Green (2006)       | Phlogopite    | Basanite    | 6.23            | 0.16            |
| Foley et al. (1996)       |               | Lamprophyre | <b>5.18</b>     | <b>0.18</b>     |
| LaTourrette et al. (1995) |               | Basanite    | 2.48            | 0.16            |
| Adam et al. (1993)        | Ca-amphibole  | Basanite    | 0.34            | 0.33            |
| Adam & Green (2006)       |               | Basanite    | <b>0.18</b>     | <b>0.33</b>     |
| LaTourrette et al. (1995) |               | Basanite    | 0.20            | 0.30            |
| Tiepolo et al. (2003)     | K-richterite  | Lamproite   | 0.07            | 1.53            |
| Adam & Green. (2006)      | Clinopyroxene | Basanite    | <0.001          | 0.1             |
| Foley et al. (1996)       |               | Lamprophyre | <b>0.0047</b>   | <b>0.0963</b>   |

**Table S5.** Run conditions, products and K<sub>2</sub>O, Na<sub>2</sub>O, Rb, Sr contents of the melt in the experiments of [Foley et al. \(1999, 2022\)](#).

| Starting Assemblage                | Cpx+Phl+Kr+5% Rt                   | Cpx+Phl+Kr          | Cpx+Phl+Kr      | Cpx+Phl+Kr  |
|------------------------------------|------------------------------------|---------------------|-----------------|-------------|
| Pressure (kbar)                    | 15                                 | 15                  | 15              | 15          |
| Temperature (°C)                   | 1025                               | 1050                | 1100            | 1200        |
| Run products                       | Cpx+ <b>Kr</b> +Ol+Phl+Rt<br>+Melt | Cpx+Phl+Ol<br>+Melt | Cpx+Phl+Ol+Melt | Cpx+Ol+Melt |
| melt compositions                  |                                    |                     |                 |             |
| K <sub>2</sub> O (wt%)             | 10.06                              | 13.42               | 12.58           | 12.87       |
| Na <sub>2</sub> O (wt%)            | 5.65                               | 4.7                 | 4.36            | 3.01        |
| Rb (ppm)                           | 128                                | 4.44                | 84              | 413         |
| Sr (ppm)                           | 419                                | 43.65               | 286             | 1603        |
| Melting degree (%)                 | 14                                 | 17                  | 24              | 44          |
| K <sub>2</sub> O/Na <sub>2</sub> O | 1.78                               | 2.86                | 2.89            | 4.28        |
| Rb/Sr                              | 0.305                              | 0.102               | 0.294           | 0.258       |

The starting assemblage is composed of a third each of Cpx, Phl and Kr, whereas the 1025 °C run also contains 5% rutile. As K<sub>2</sub>O, Na<sub>2</sub>O, Rb and Sr are absent in rutile, its influence on melt K<sub>2</sub>O/Na<sub>2</sub>O and Rb/Sr can be neglected.



**Table S6.** Phase proportions and melting modes used in the non-modal fractional melting modelling.

|                                                                              | Ol    | Opx   | Cpx   | Grt  | Sp   | Phl  | Kr   | Sum |
|------------------------------------------------------------------------------|-------|-------|-------|------|------|------|------|-----|
| Source mineral weight fractions                                              |       |       |       |      |      |      |      |     |
| Grt-phl-lherz (PU624)                                                        | 0.50  | 0.09  | 0.20  | 0.16 | 0.00 | 0.06 |      | 1   |
| Grt-kr-lherz (PU620)                                                         | 0.52  | 0.08  | 0.16  | 0.17 |      |      | 0.07 | 1   |
| Sp-phl-lherz (BRIAN-PHL)                                                     | 0.44  | 0.30  | 0.16  |      | 0.03 | 0.07 |      | 1   |
| Sp-kr-lherz (BRIAN-KR)                                                       | 0.42  | 0.28  | 0.15  |      | 0.03 |      | 0.13 | 1   |
| weight fractions of mineral in the partial melts (before Phl / Kr disappear) |       |       |       |      |      |      |      |     |
| Grt-phl-lherz (C16)                                                          | -0.06 | -0.23 | 0.52  | 0.18 |      | 0.59 |      | 1   |
| Grt-kr-lherz (S93)                                                           |       | -1.45 | -0.77 |      |      |      | 3.23 | 1   |
| Sp-phl-lherz (C14)                                                           | -0.58 | 0.56  | 0.47  |      | 0.05 | 0.50 |      | 1   |
| Sp-kr-lherz (S93)                                                            | -0.69 |       | -0.53 |      |      |      | 2.22 | 1   |
| weight fractions of mineral in the partial melts (after Phl / Kr disappear)  |       |       |       |      |      |      |      |     |
| Grt-lherz (P03)                                                              | 0.08  | -0.19 | 0.81  | 0.30 |      |      |      | 1   |
| Sp-lherz (P03)                                                               | -0.25 | 0.33  | 0.83  |      | 0.08 |      |      | 1   |

**Table S7.** Partition coefficients used in the non-modal fractional melting modelling.

|                 | Ol      | Opx    | Cpx   | Grt    | Sp     | Phl    | Kr     |
|-----------------|---------|--------|-------|--------|--------|--------|--------|
| D <sub>La</sub> | 0       | 0.0003 | 0.029 | 0.0014 | 0.0100 | 0.0001 | 0.0821 |
| D <sub>Dy</sub> | 0.00068 | 0.0033 | 0.33  | 2.4    | 0.01   | 0.017  | 0.0665 |
| D <sub>Yb</sub> | 0.0011  | 0.0044 | 0.28  | 6.5    | 0.01   | 0.01   | 0.1105 |

Partition coefficients in olivine (Ol), orthopyroxene (Opx), clinopyroxene (Cpx), garnet (Grt), phlogopite (Phl) are from [Prelević et al. \(2012\)](#). D values in spinel (Sp) and K-richterite (Kr) are from [McKenzie & O'Nions \(1991\)](#) and [Tiepolo et al. \(2003\)](#), respectively. These D values are comparable to numerous other studies (<https://kdd.earthref.org/KdD/>).

## References

- Adam, J., & Green, T. (2006). Trace element partitioning between mica- and amphibole-bearing garnet lherzolite and hydrous basanitic melt: 1. Experimental results and the investigation of controls on partitioning behaviour. *Contributions to Mineralogy and Petrology*, 152(1), 1-17. <https://doi.org/10.1007/s00410-006-0085-4>
- Adam, J., Green, T. H., & Sie, S. H. (1993). Proton Microprobe Determined Partitioning of Rb, Sr, Ba, Y, Zr, Nb and Ta between Experimentally Produced Amphiboles and Silicate Melts with Variable F Content. *Chemical Geology*, 109(1-4), 29-49. [https://doi.org/10.1016/0009-2541\(93\)90060-V](https://doi.org/10.1016/0009-2541(93)90060-V)
- Condamine, P., and Médard, E., 2014, Experimental melting of phlogopite-bearing mantle at 1 GPa: Implications for potassic magmatism: *Earth and Planetary Science Letters*, v. 397, p. 80-92, doi: <https://doi.org/10.1016/j.epsl.2014.04.027>.
- Foley, S. F., Ezad, I. S., van der Laan, S. R., and Pertermann, M., 2022, Melting of hydrous pyroxenites with alkali amphiboles in the continental mantle: 1. Melting relations and major element compositions of melts: *Geoscience Frontiers*, p. 101380, doi: <https://doi.org/10.1016/j.gsf.2022.101380>.
- Foley, S. F., Jackson, S. E., Fryer, B. J., Greenough, J. D., & Jenner, G. A. (1996). Trace element partition coefficients for clinopyroxene and phlogopite in an alkaline lamprophyre from Newfoundland by LAM-ICP-MS. *Geochimica et Cosmochimica Acta*, 60(4), 629-638. [https://doi.org/10.1016/0016-7037\(95\)00422-X](https://doi.org/10.1016/0016-7037(95)00422-X)
- Foley, S. F., Musselwhite, D. S., and Van der Laan, S. R., Melt compositions from ultramafic vein assemblages in the lithospheric mantle: a comparison of cratonic and non-cratonic settings, in *Proceedings International Kimberlite Conference 1999*, Volume 1, Red Roof Design Cape Town, p. 238-246.
- LaTourrette, T., Hervig, R. L., & Holloway, J. R. (1995). Trace element partitioning between amphibole, phlogopite, and basanite melt. *Earth and Planetary Science Letters*, 135(1), 13-30. [https://doi.org/10.1016/0012-821X\(95\)00146-4](https://doi.org/10.1016/0012-821X(95)00146-4)
- McKenzie, D. A. N., & O'Nions, R. K. (1991). Partial melt distributions from inversion of rare earth element concentrations. *Journal of Petrology*, 32(5), 1021-1091. <https://doi.org/10.1093/petrology/32.5.1021>
- Prelević, D., Akal, C., Foley, S. F., Romer, R. L., Stracke, A., & Van Den Bogaard, P. (2012). Ultrapotassic Mafic Rocks as Geochemical Proxies for Post-collisional Dynamics of Orogenic Lithospheric Mantle: the Case of Southwestern Anatolia, Turkey. *Journal of Petrology*, 53(5), 1019-1055. <https://doi.org/10.1093/petrology/egs008>
- Tiepolo, M., Zanetti, A., Oberti, R., Brumm, R., Foley, S., & Vannucci, R. (2003). Trace-element partitioning between synthetic potassic-richertites and silicate melts, and contrasts with the partitioning behaviour of pargasites and kaersutites. *European Journal of Mineralogy*, 15(2), 329-340. <https://doi.org/10.1127/0935-1221/2003/0015-0329>
- Zanetti, A., Mazzucchelli, M., Rivalenti, G., and Vannucci, R., 1999, The Finero phlogopite-peridotite massif: an example of subduction-related metasomatism: *Contributions to Mineralogy and Petrology*, v. 134, no. 2, p. 107-122, doi: <https://doi.org/10.1007/s004100050472>.
- Zhang, Z., Dong, X., Liou, J., Liu, F., Wang, W., and Yui, F., 2011, Metasomatism of garnet peridotite from Jiangzhuang, southern Sulu UHP belt: constraints on the interactions between crust and mantle rocks during subduction of continental lithosphere: *Journal of Metamorphic Geology*, v. 29, no. 9, p. 917-937, doi: <https://doi.org/10.1111/j.1525-1314.2011.00947.x>.
